# Supplementary material
Source: PubMed Central journal article supplement (PMC1482584)

**A**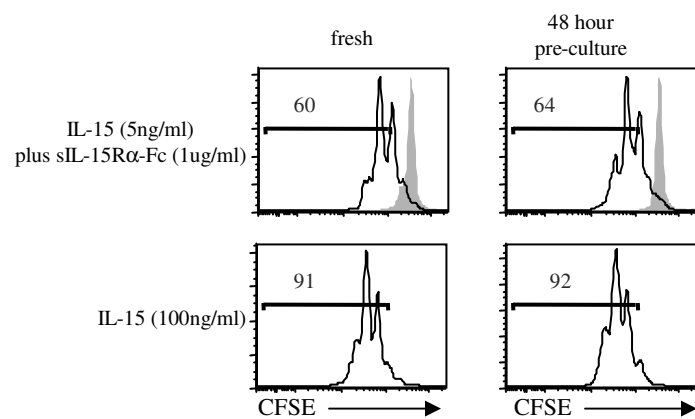**B**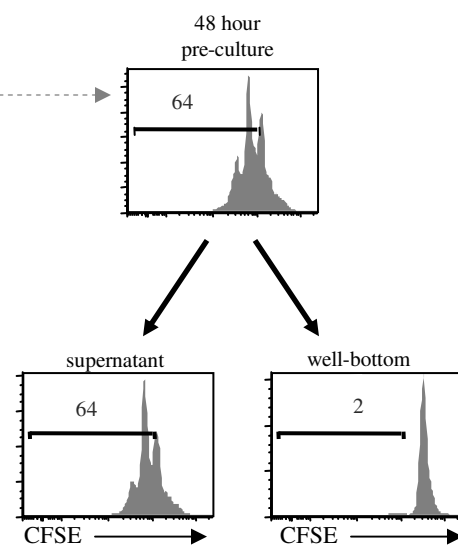

Supplement: pnas_0600240103_1.pdf [file pnas_0600240103_1.pdf]

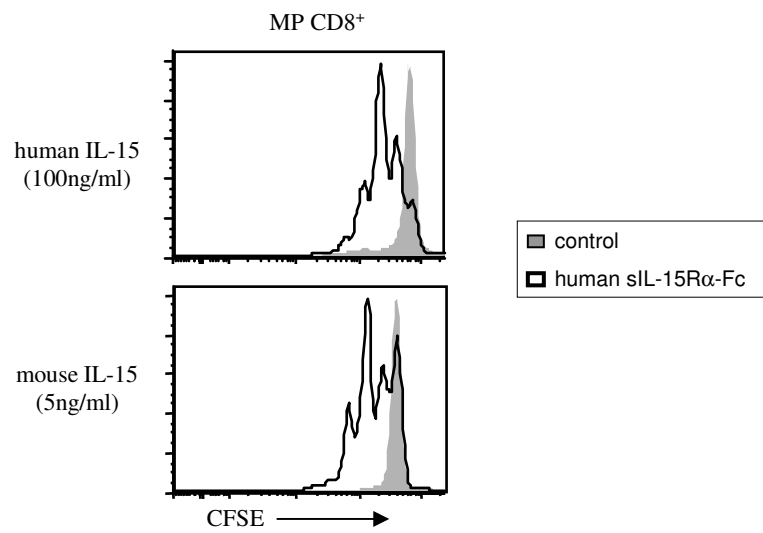

Supplement: pnas_0600240103_2.pdf [file pnas_0600240103_2.pdf]

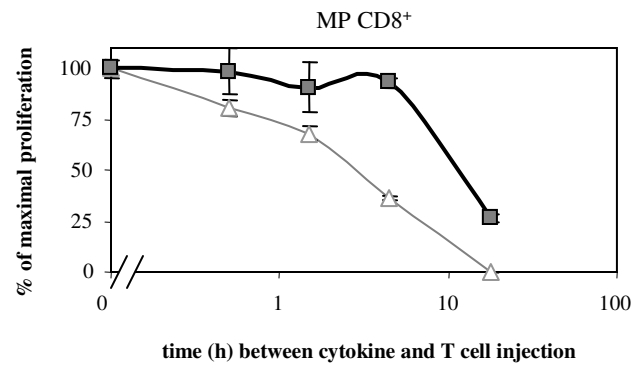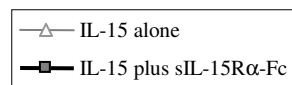

Supplement: pnas_0600240103_3.pdf [file pnas_0600240103_3.pdf]

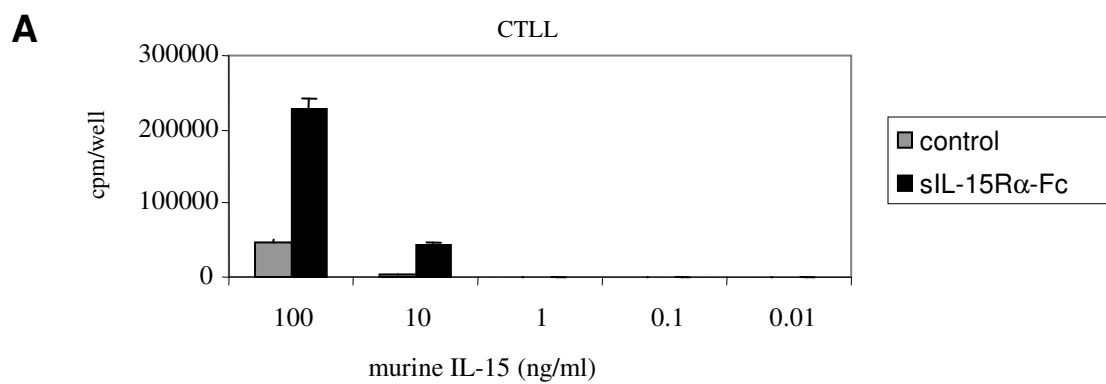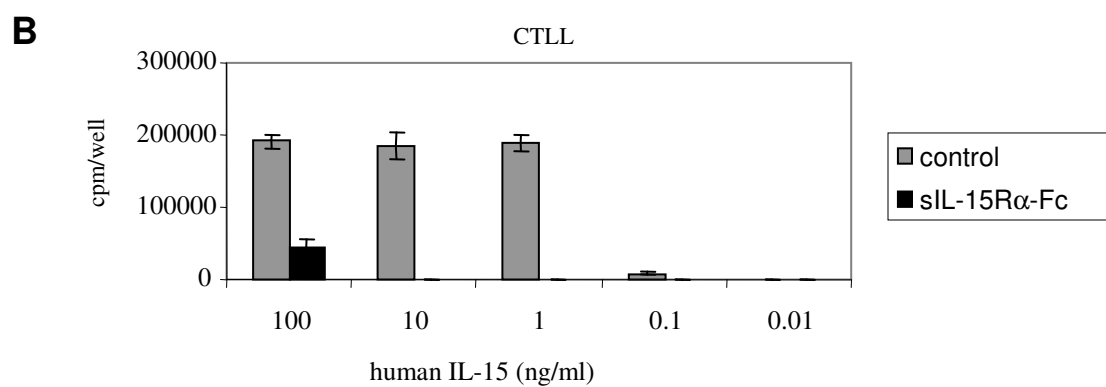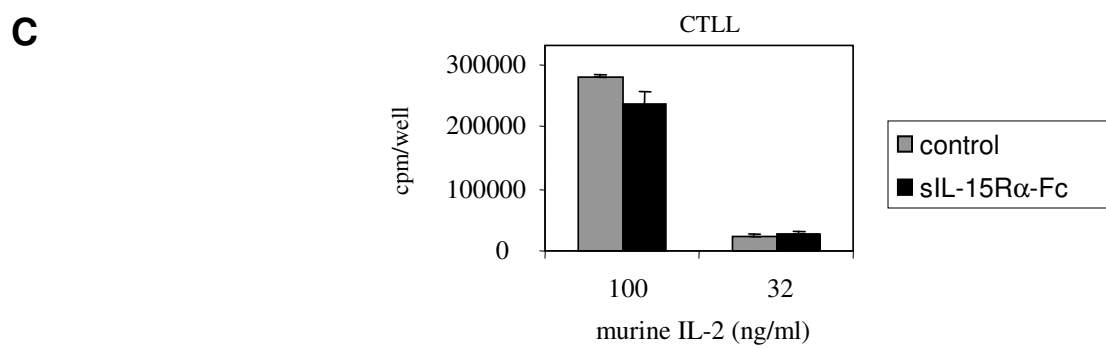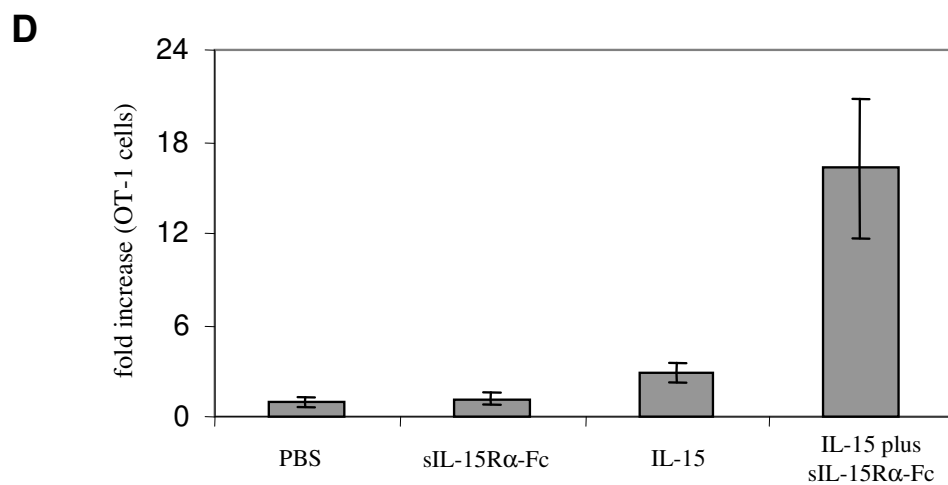

Supplement: pnas_0600240103_4.pdf [file pnas_0600240103_4.pdf]
